1

2

3

4

5

## **Lag Effects in Primate Brain Size Evolution:**

6

### **A Re-Evaluation**

7

8

9

10

**R.I.M. Dunbar**

11

12

13

Department of Experimental Psychology

14

University of Oxford

15

South Parks Road

16

Oxford OX1 3UD, UK

17

18

[email: [robin.dunbar@psy.ox.ac.uk](mailto:robin.dunbar@psy.ox.ac.uk)]

19

20

## Abstract

21 The question as to whether there is a lag between brain and body mass evolution was  
22 ostensibly solved two decades ago by Deaner & Nunn (1999) who used phylogenetic  
23 methods to show that there was no evidence to suggest that changes in brain size  
24 lagged behind changes in body size. However, their assumption that body size would  
25 always change ahead of brain size is open to question. In addition, many of their  
26 datapoints are confounded by grade shift effects. A reanalysis of their data controlling  
27 for these confounds shows that there is in fact a strong lag effect, but that the direction  
28 of the lag is the reverse of that originally assumed: brain size typically changes first,  
29 and does so under selection from changes in group size. The data suggest that it takes  
30 about 2.0 million years for body size to converge back onto the conventional  
31 allometric relationship with brain size. In the meantime, species that have increased  
32 brain size are likely to incur a significant energy cost that must be met from  
33 elsewhere. I show that they seem to do so by changing to a more nutrient-rich diet.

34

35 **Key words:** brain mass, body mass, group size, diet, allometry, energy deficit

36

## 37 **1. Introduction**

38           Ever since Jerison's (1973) seminal analyses, it has been known that, across  
39 mammals in general and primates in particular, brain size is correlated with body  
40 mass in an allometric power relationship. Nevertheless, there is considerable variation  
41 around the common regression line, and it was commonly suggested that this is a  
42 consequence of a lag effect in which brain mass takes time to catch up with changes  
43 in body mass (Jerison 1973; Lande 1979; Martin & Harvey 1985; Willner & Martin  
44 1985; Deacon 1990b, 1997; Aboitiz 1996). This assumption is based mainly on the  
45 fact that body size is relatively labile, and can vary considerably within species as a  
46 function of local environmental conditions (Dunbar 1990; Bettridge et al. 2010),  
47 whereas the complex interconnectivity of brain systems means that it is likely to take  
48 longer to bring together the necessary genetic changes without disrupting functional  
49 neural systems. Such an effect might explain the well established fact that body size  
50 has outstripped brain size in most domesticated species (Hemmer 1990). It is, however,  
51 assumed that, given enough time, brain and body size converge on the common  
52 regression line under pressure from some form of stabilising selection. That brain and  
53 body mass are not yoked in close genetic linkage is confirmed by breeding  
54 experiments showing that brain size and body size can undergo independent selection,  
55 at least in the short term (Riska & Atchley 1985).

56           Deaner & Nunn (1999) developed a novel method for testing the lag  
57 hypothesis that involved plotting the residuals of phylogenetic contrasts in brain mass  
58 regressed on contrasts in body mass for a sample of primates against date of  
59 divergence. They tested the explicit hypothesis that the lag would be directional: body  
60 mass would always change first (hence this was always taken as a positive change),  
61 and the lag would thus necessarily be brain mass lagging behind body mass. This

62 being so, a lag, if present, should be evidenced by a positive correlation because  
63 ‘young’ nodes would consist of species pairs with negative residuals when body mass  
64 contrasts are constrained always to be positive. They found that there was no  
65 correlation between the two variables, either for males or for females, or when  
66 controlling for ecology, and concluded that there was no evidence for lag effect.

67         However, there is no principled reason why body size has to change first.  
68 Much will depend on the ecological pressures acting on brain and body mass, and  
69 these can be very different. Brain size is known to be driven by changes in the  
70 cognitive demands imposed by increasing social group size (Dunbar 1998; Perez-  
71 Barberia et al. 2007; Shultz & Dunbar 2007; Dunbar & Shultz 2007, 2010). If brain  
72 size is responding mainly to pressures to evolve larger group sizes but body size  
73 responds mainly to ecological pressures (e.g. nutrient availability), then the two need  
74 not be in close linkage. A further problem that emerges with their analysis is that  
75 many of the nodes they use are not closely related and involve major grade shifts,  
76 potentially resulting in further confounds. In this paper, I reanalyse their data and  
77 show that there is, in fact, clear evidence for a lag effect.

78

## 79 **2. Methods**

80         In order to ensure that any differences between Deaner & Nunn’s original  
81 results and the new analyses are due to methodology and not to different data  
82 samples, I use the dataset provided by Deaner & Nunn (1999). Their data are CAIC  
83 contrasts without reference to divergence times on the grounds that they wanted to use  
84 divergence time as an independent variable in the analysis. They explicitly used only  
85 nodes that were tip comparisons (i.e. comparisons between living species) and  
86 avoided nodes at higher levels in the phylogeny (which hence have to be estimated).

87 They used the Stephan et al. (1969) brain dataset because this provides data on actual  
88 brain and body masses for the same individual specimens. This dataset yields a set of  
89 24 nodes for which contrasts in brain mass and contrasts in body mass are available.  
90 Although a much larger sample of species is available for cranial volumes (e.g. Isler  
91 et al. 2008), Deaner & Nunn (1999) argued (rightly) that these datasets risked  
92 introducing unnecessary error variance: their main problem is that the body mass and  
93 cranial volume data derive from different animals. I did, however, check out this data  
94 source, but the sample size is no larger once the data are filtered for group size and  
95 divergence dates. I use the divergence times as given by Deaner & Nunn (1999)  
96 (based on Purvis 1995) as well as more recent estimates provided by Perelman et al.  
97 (2011). Group size and dietary data for individual species are from Campbell et al.  
98 (2007), with the exception of baboon group sizes which derive from Bettridge et al.  
99 (2010).

100       Where we are testing a directional hypothesis, one-tailed statistical tests are  
101 appropriate: in such cases, a significant correlation in the opposite direction would be  
102 evidence *against* the hypothesis. In testing all other hypotheses, 2-tailed tests are  
103 used.

104

### 105 **3. Results**

106       Fig. 1 plots the residuals in the contrasts for brain mass as a function of body  
107 mass against divergence time. Essentially these are the data as presented by Deaner &  
108 Nunn (1999) and are the data they use to justify their conclusion. Deaner & Nunn  
109 (1999) tested for a positive relationship with time, but found a regression slope that  
110 did not differ significantly from  $b=0$ , and concluded from this that there was no  
111 evidence for any lag effect. However, inspection of Fig. 1 indicates that the datapoints

112 are evenly distributed either side of zero, with a variance that has a funnel shape, so it  
113 is no surprise that there was the correlation did not differ from zero: this is simply a  
114 consequence of using residuals from the common regression. More importantly, a  
115 funnel-shaped pattern of variance is exactly what would be expected if there is a lag  
116 effect but the direction of the lag is unspecified (i.e. sometimes body size changes  
117 first, and sometimes brain size changes first).

118 This being so, absolute residuals should be plotted against divergence date  
119 (Fig. 2). The relationship is clearly negative, albeit not significant (Spearman  $r_s=-$   
120  $0.074$ ,  $p=0.362$  1-tailed). One obvious problem with these data is that they mix  
121 contrasts of very different taxonomic status, namely contrasts between closely related  
122 species (i.e. those within the same genus) and species that belong to different genera,  
123 and in some cases even different families (highlighted as solid and open symbols).  
124 Most of the latter are strepsirrhines, but they also include the contrast between *Homo*  
125 and *Pan* and that between *Allouatta* and *Lagothrix*, both of which involve very large  
126 differences in sociality (especially group size) as well as brain volume. These risk  
127 confounding the lag relationship with major grade shifts in brain size (see Aiello &  
128 Dunbar 1992; Dunbar 1993). This is especially problematic for the strepsirrhines,  
129 where there are grade shifts between nocturnal and diurnal species (Barton 1998), as  
130 well as the grade shift between strepsirrhines and haplorhines. They also all entail  
131 large differences in sociality involving the transition between semi-solitary species  
132 and those that live in multimale/multifemale groups. If we consider only pairwise  
133 comparisons for closely related species (i.e. those belonging to the same genus), the  
134 correlation between residual brain mass and divergence date is in fact highly  
135 significant ( $r_s=-0.593$ ,  $N=13$ ,  $p=0.017$  1-tailed). In contrast, the correlation for the

136 between-genus contrasts is not significant (Spearman  $r=-0.210$ ,  $N=12$ ,  $p=0.256$  1-  
137 tailed), although the slope is similar to that for within-genus nodes.

138         Deaner & Nunn (1999) tested for a relationship between social group size and  
139 residual brain size, but found none. However, using more up-to-date data on species  
140 mean group sizes, there is in fact a significant linear regression between contrasts in  
141 mean taxon group size and residuals in brain size contrasts (Fig. 3;  $F_{1,17}=6.15$ ,  
142  $r^2=0.266$ ,  $p=0.024$  2-tailed). Two things are immediately apparent, however: first,  
143 there is a very striking grade difference between strepsirrhines (prosimians) and  
144 haplorhines (anthropoids) and, second, the relationship is clearly non-linear (hence,  
145 the likely reason why Deaner & Nunn obtained a non-significant result when using a  
146 linear regression). Both effects are in fact well established features of the social brain  
147 hypothesis (Dunbar 1993, 1998), and were well known at the time. Partitioning the  
148 data by sub-order, and logging group size, yields significant improvements in fit  
149 (prosimians:  $F_{1,2}=7.96$ ,  $r^2=0.726$ ,  $p=0.067$  2-tailed; anthropoids:  $F_{1,12}=19.955$ ,  
150  $r^2=0.624$ ,  $p=0.001$ , with a considerable further improvement in fit in the latter case for  
151 a quadratic relationship,  $r^2=0.760$ ). Pooling these results using Fisher's meta-analysis  
152 (Sokal & Rolf 1969) yields a highly significant result ( $\chi^2=21.99$ ,  $df=4$ ,  $p=0.0002$ ),  
153 indicating that there is a consistent common trend underlying both these datasets.

154         Given that there is an effect of group size, we perhaps need to reconsider the  
155 brain lag effect with this in mind. Fig. 4 plots the residuals from a multiple regression  
156 of contrasts in brain mass regressed on both the contrast in body mass and the contrast  
157 in group size, plotted against divergence date, for within-genus contrasts only. The  
158 multiple regression is highly significant, with significant main effects (body mass:  
159  $t_{16}=2.97$ ,  $p=0.009$  2-tailed; group size:  $t_{16}=2.48$ ,  $p=0.025$  2-tailed). Since, in primates,  
160 changes in group size over phylogenetic time are almost never negative (Perez-

161 Barberia et al. 2007), the plotted residuals are absolute values. A linear regression for  
162 these data is not significant ( $F_{1,8}=1.70$ ,  $r^2=0.229$ ,  $p=0.115$  1-tailed), but a power  
163 relationship is significant ( $F_{1,8}=4.24$ ,  $r^2=0.358$ ,  $p=0.035$  1-tailed, since a negative  
164 relationship is not possible). Note that the asymptote is at a residual value of  $\sim 0.035$ ,  
165 and thus lies just above the common regression line. Mathematically, the point of  
166 inflexion is defined by the value on the X axis that is equivalent to  $1/e$  back from the  
167 asymptotic value on the Y axis. Taking  $Y=0.035$  as the asymptotic value and the  
168 highest datapoint as the origin ( $Y=0.153$ ), this gives a value of 0.7 million years as the  
169 time it typically takes for the brain-body mass relationship to come back into balance.

170         Although the dates given by Deaner & Nunn (1999) correlate significantly  
171 ( $r=0.659$ ,  $N=19$ ,  $p=0.002$ ) with the more recent estimates by Perelman et al. (2011),  
172 the latter tend to be deeper (the intercept for the regression equation plotting the more  
173 recent values against the older values is  $+2.395$  Ma). Recalculation of the inflexion  
174 point for the same dataset using the Perelman et al. (2011) dates yields an estimate of  
175 3.6 Ma. Since the Perelman et al. estimates are based exclusively on molecular data,  
176 their divergence dates identify, in effect, a last common ancestor, and thus constitute  
177 an upper limit. The date of population divergence (i.e. speciation *sensu stricto*) is  
178 likely to be a great deal less. Something in the order of 2 million years is thus  
179 probably a reasonable suggestion.

180         Deaner & Nunn (1997) implicitly assumed a causal relationship in which  
181 changes in body size drive changes in brain size (presumably as an inevitable  
182 consequence of the allometric relationship between the two), with changes in group  
183 size presumably being a consequence of changes in brain size (i.e. a default by-  
184 product benefit). A path analysis of the relationship between the three variables yields  
185 a best fit model in which brain size independently predicts both body mass and group



186 size (Fig. 5). This pattern is confirmed by a mediation analysis: body size does not  
187 significantly influence group size, or *vice versa*, via brain size. Note that by ‘predict’  
188 here is meant ‘constrains’, and not ‘evolutionary cause’ (or driver). In evolutionary  
189 (or selection) terms, the causal arrows are reversed: increases in group size select for  
190 increases in brain size, but changes in brain size are at the same time dependent on  
191 changes in body mass to provide the sufficient energy surplus through the allometric  
192 relationship between basal metabolic rate (BMR) and body mass (Schmidt-Nielson  
193 1984; Martin 1990) to fuel brain growth.

194       Species that have undergone significant change in brain size in response to the  
195 need to increase group size will be paying an energetic cost: until body size comes  
196 back into line with brain size, they cannot benefit from the spare nutrient capacity  
197 made possible by the allometric relationship between BMR and body size (Martin  
198 1990). To meet this demand, species will be obliged to find the additional energy and  
199 other nutrients required to fuel brain growth either through a change in diet, or by  
200 switching energy demand from other parts of the body (the expensive tissue  
201 hypothesis: Aiello & Wheeler 1995) or by reducing the energetic costs of foraging  
202 (Dunbar et al. 2009). In fact, it seems that most of the adjustment, in this sample at  
203 least, is provided by a shift to a more frugivorous (and hence more nutrient-rich) diet:  
204 on average, nodes with large residuals (absolute residual >0.05) in the contrast in  
205 brain size in Fig. 4 have a significantly greater contrast in dietary frugivory in favour  
206 of the bigger brained species than nodes with smaller residuals, although the sample is  
207 small (means of  $+12.7 \pm 5.8\%$  vs  $-32.5 \pm 34.4\%$ ,  $\eta=0.766$ ;  $F_{1,5}=7.09$ ,  $p=0.045$  2-tailed).

208

#### 209 **4. Discussion**

210           Taken together, these results imply that, as often as not, changes in group size  
211 trigger correlated changes in brain volume, initially without necessarily affecting  
212 body size (leading to high residuals); with time, body size catches up, but Fig. 4  
213 suggests that this probably takes around 1-3 million years. The path analysis indicates  
214 that this change is invariably driven by increases in group size, and that the  
215 relationship between brain size and body size is independent of group size (i.e. is not  
216 directly determined by changes in group size). Although they endeavoured to control  
217 for ecological changes in their analysis, it seems that Deaner & Nunn (1999) failed to  
218 control for a much more important source of confound, namely the grade changes in  
219 relative brain size that occur within the primates. They also failed to control properly  
220 for social group size, mainly because they used a linear regression when the social  
221 brain relationship is explicitly non-linear (Dunbar 1992) and contains very distinct  
222 grades in the group size/brain size relationship (Dunbar 1993). Had they had more  
223 species available to them, the grade shift effects might have been lost in the error  
224 variance, but with a relatively small sample their impact is significant. Unfortunately,  
225 we are in no better position now in terms of available data than they were two decades  
226 ago because the most extensive brain dataset is still the one they used.

227           The initial impact of changes in brain size on the relationship between brain  
228 and body size places a significant strain on nutrient balance in species that make this  
229 change, and to balance their nutrient budget they have to increase nutrient throughput.  
230 For most monkeys, this means a more frugivorous, and less folivorous, diet. This shift  
231 to a richer diet may explain why the asymptotic value lies just above the common  
232 regression line: species that make this transition do not fully return to the common  
233 regression, but exploit their improved diet to maintain a slightly smaller body mass  
234 than would be expected. In cases, such as the *Pan-Homo* transition, where the change

235 in brain size is massive, the increase only seems to have been possible by switching  
236 resources away from other expensive anatomical regions (notably the gut) to the brain  
237 (the expensive tissue hypothesis: Aiello & Wheeler 1995). This is, however, unlikely  
238 to be a general solution since it imposes major restrictions through gut specialisation.

239         This perhaps suggests a reason why several, somewhat misconceived, attempts  
240 to test the expensive tissue hypothesis on New World monkeys (Allen & Kay 2012;  
241 Hartwig et al. 2011) and mammals more generally (Navarette et al. 2011) have  
242 produced negative results: in fact, these species adopted a much simpler strategy for  
243 meeting their energy deficits, namely switching to a richer diet. In contrast, the diets  
244 of great apes are much more frugivorous than those of any monkeys (on average, 69%  
245 fruits vs 51%, N=5 and N=116 species, respectively: Campbell et al. 2007); as a  
246 result, there would have been limited room for further movement in the same  
247 direction in the transition into *Homo*, and hence a need for a more radical alternative  
248 strategy of the kind suggested by Aiello & Wheeler (1995). In fact, of course, the  
249 expensive tissue hypothesis was never offered as an explanation for primate brain  
250 evolution, but rather for brain size evolution in *Homo*. Indeed, this strategy may only  
251 be possible when the larger body mass of great apes allows more gut volume that can  
252 be spared.

253         In effect, it seems that Deaner & Nunn (1997) were looking at the problem the  
254 wrong way around. The assumption that the lag is based on initial changes in body  
255 size because this is physiologically and/or genetically more labile is incorrect, at least  
256 for primates. The analyses presented here suggest that quite the reverse is true: in  
257 many cases, body size change occurs *because* change has occurred in brain size,  
258 which in turn is driven by change in group size. While it is possible that the change in  
259 body size is an independent response to the same selection factor that is driving group

260 size change (namely, predation risk: van Schaik 1982; Shultz et al. 2004; Dunbar &  
261 Shultz 2007; Bettridge & Dunbar 2012), it remains a possibility to be tested that  
262 species who opt to increase brain size ultimately need to evolve a larger body size in  
263 order to benefit from the allometric relationship between BMR and body size so as to  
264 pay for some of that increase in brain mass.

265

266

### 267 **Acknowledgments**

268 My research is funded by an ERC Advanced Investigator grant.

269 **References**

270

- 271 1. Aboitiz, F. 1996 Does bigger mean better? Evolutionary determinants of brain  
272 size and structure. *Brain, Behavior and Evolution* 47, 225-245.
- 273 2. Aiello, L.C. & Wheeler, P. (1995). The expensive tissue hypothesis: the brain  
274 and the digestive system in human evolution. *Current Anthropology* 36: 199–  
275 221.
- 276 3. Allen, K.L. & Kay, R.F. (2012). Dietary quality and encephalization in  
277 platyrrhine primates. *Proceedings of the Royal Society, London* 279B: 715-  
278 721.
- 279 4. Barton, R.A. (1998). Visual specialization and brain evolution in primates.  
280 *Proceedings of the Royal Society, London*, 265B: 1933-1937.
- 281 5. Bettridge, C. & Dunbar, R.I.M. (2012). Predation as a determinant of  
282 minimum group size in baboons. *Folia Primatologica* 83: 332-352.
- 283 6. Bettridge, C., Lehmann, J. & Dunbar, R.I.M. (2010). Trade-offs between time,  
284 predation risk and life history, and their implications for biogeography: a  
285 systems modelling approach with a primate case study. *Ecological Modelling*  
286 221: 777-790.
- 287 7. Campbell, C.J., Fuentes, A., Mackinnon, C.G., Panger, M. & Bearder, S.K. (eds)  
288 (2007). *Primates in Perspective*. Oxford: Oxford University Press.
- 289 8. Deacon, T. W. 1990 Rethinking mammalian brain evolution. *American*  
290 *Zoologist* 30, 629-705.
- 291 9. Deacon, T. W. 1997 *The symbolic species: the co-evolution of language and*  
292 *the brain*. New York: W. W. Norton & Co.
- 293 10. Deaner, R.O. & Nunn, C.L. (1999). How quickly do brains catch up with

- 294 bodies? A comparative method for detecting evolutionary lag. *Proceedings of*  
295 *the Royal Society, London*, 266B: 687-694.
- 296 11. Dunbar, R. (1990). Environmental determinants of intraspecific variation in  
297 body weight in baboons (*Papio* spp.). *Journal of Zoology*. 220: 157-169.
- 298 12. Dunbar, R.I.M. & Shultz, S. (2007). Understanding primate brain evolution.  
299 *Philosophical Transactions of the Royal Society, London*, 362B: 649-658.
- 300 13. Dunbar, R.I.M., Korstjens, A.H. & Lehmann, J. (2009). Time as an ecological  
301 constraint. *Biological Reviews* 84: 413-429.
- 302 14. Hartwig, W., Rosenberger, A., Norconk, M. & Owl, M. (2011). Relative brain  
303 size, gut size, and evolution in New World Monkeys. *Anatomical Record* 294:  
304 2207–21.
- 305 15. Hemmer, H. 1990 *Domestication: The Decline of Environmental*  
306 *Appreciation*. Cambridge: Cambridge University Press.
- 307 16. Isler, K., Kirk, E.C., Miller, J.M.A., Albrecht, G.A., Gelvin, B.R. & Martin,  
308 R.D. (2008). Endocranial volumes of primate species: scaling analyses using a  
309 comprehensive and reliable data set. *Journal of Human Evolution* 55: 967-978.
- 310 17. Jerison, H.J. (1973). *Evolution of the Brain and Intelligence*. New York:  
311 Academic Press.
- 312 18. Lande, R. 1979 Quantitative genetic analysis of multivariate evolution, applied  
313 to brain: body size allometry. *Evolution* 33, 402-416.
- 314 19. Martin, R.D. (1981). Relative brain size and metabolic rate in terrestrial  
315 vertebrates. *Nature* 293: 57-60.
- 316 20. Martin, R. D. & Harvey, P. H. 1985 Brain size allometry: ontogeny and  
317 phylogeny. In: W.L. Jungers (ed.) *Size and scaling in primate biology*, pp.  
318 147-173. New York: Plenum Press.

- 319 21. Navarette, A., van Schaik, C. P. & Isler, K. (2011). Energetics and the  
320 evolution of human brain size. *Nature* 480: 91-93.
- 321 22. Pérez-Barbería, J., Shultz, S. & Dunbar, R.i.m. (2007). Evidence for intense  
322 coevolution of sociality and brain size in three orders of mammals. *Evolution*  
323 61: 2811-2821.
- 324 23. Purvis, A. (1995). A composite estimate of primate phylogeny. *Philosophical*  
325 *Transactions of the Royal Society, London*, 348B: 405-421.
- 326 24. Riska, B. & Atchley, W. R. 1985 Genetics of growth predicts patterns of  
327 brain-size evolution. *Science* 229, 1302-1304.
- 328 25. van Schaik CP (1983) Why are diurnal primates living in groups.  
329 *Behaviour* 87: 120-144.
- 330 26. Schmidt-Nielsen, K. (1984). *Scaling: Why is Animal Size So Important?*  
331 Cambridge: Cambridge University Press.
- 332 27. Shultz, S. & Dunbar, R.I.M. (2007). The evolution of the social brain:  
333 Anthropoid primates contrast with other vertebrates. *Proceedings of the Royal*  
334 *Society, London*, 274B: 2429-2436.
- 335 **28.** Shultz, S. & Dunbar, R.I.M. (2010). Encephalisation is not a universal  
336 macroevolutionary phenomenon in mammals but is associated with sociality.  
337 *Proceedings of the National Academy of Sciences, USA*, 107: 21582-21586.
- 338 29. Shultz, S., Noe, R., McGraw, S. & Dunbar, R.I.M. (2004). A community-level  
339 evaluation of the impact of prey behavioural and ecological characteristics on  
340 predator diet composition. *Proceedings of the Royal Society, London*, 271B:  
341 725-732.
- 342 30. Sokal, R.R. & Rolf, F.J. (1969). *Biometry*. San Francisco: Freeman.

- 343 31. Stephan, H., Frahm, H. & Baron, G. (1981). New and revised data on volumes  
344 of brain structures in insectivores and primates. *Folia Primatologica* 35, 1-  
345 29. □
- 346 32. Willner, L. & Martin, R.D. 1985 Some basic principles of mammalian sexual  
347 dimorphism. In: J. Ghesquiere, R.D. Martin & F. Newcombe (eds.) *Human*  
348 *sexual dimorphism*, pp. 1-19. London: Taylor & Francis.



349

## Legends to Figures

350

351 Fig. 1. Residuals of contrast in brain mass regressed against contrasts in brain mass  
352 plotted against time of divergence for the species pairs. Dashed lines are the  
353 upper and lower bounds.

354

355 Fig. 2. Absolute residuals of contrast in brain mass, plotted against time since  
356 divergence. Dashed line is the least squares regression for these data points.  
357 Data points from Fig. 1.

358

359 Fig. 3. Residual of contrast in brain mass against contrast in body mass, plotted  
360 against contrasts in mean group size. Solid symbols: nodes between species  
361 pairs from the same genus; open symbols: nodes between species pairs from  
362 different genera. Hashed lines are the least squares regression lines through the  
363 two sets of data.

364

365 Fig. 4. Absolute residual in contrast in brain mass against the common regression line  
366 for contrasts in both body mass and social group size, plotted against time  
367 since divergence. Linear and power regression lines are plotted.

368

369 Fig. 5. Path analysis of the functional relationships between the three main variables,  
370 contrasts in brain mass, contrasts in body mass and contrasts in mean social  
371 groups size. The plotted relationships, and the numbers given on the graph, are  
372 the significant ( $p < 0.05$ ) standardised slopes ( $\beta$ ).

373

374

**Figure 1**

375

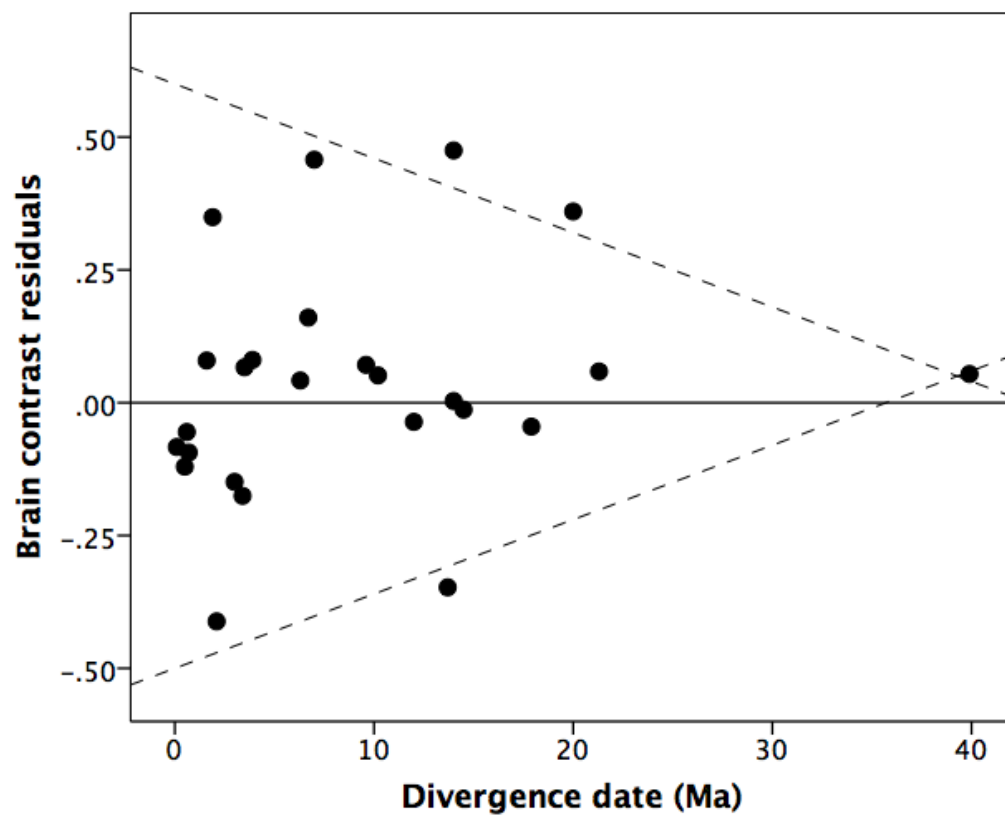

376

377

378

379

380

381

**Figure 2**

382

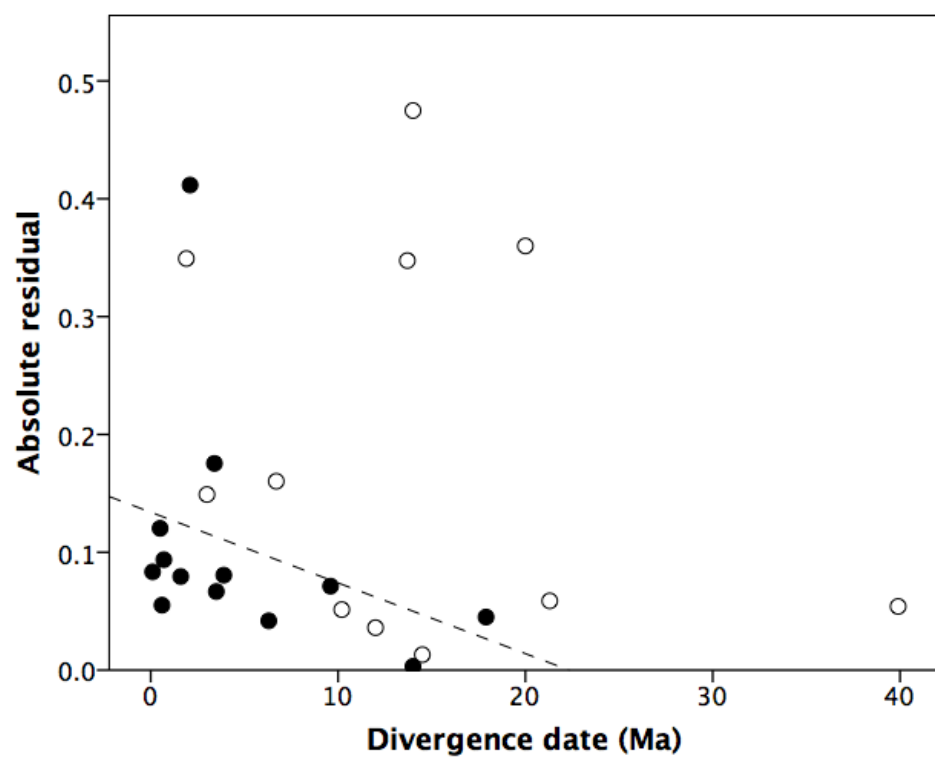

383

384

385

386

387

**Figure 3**

388

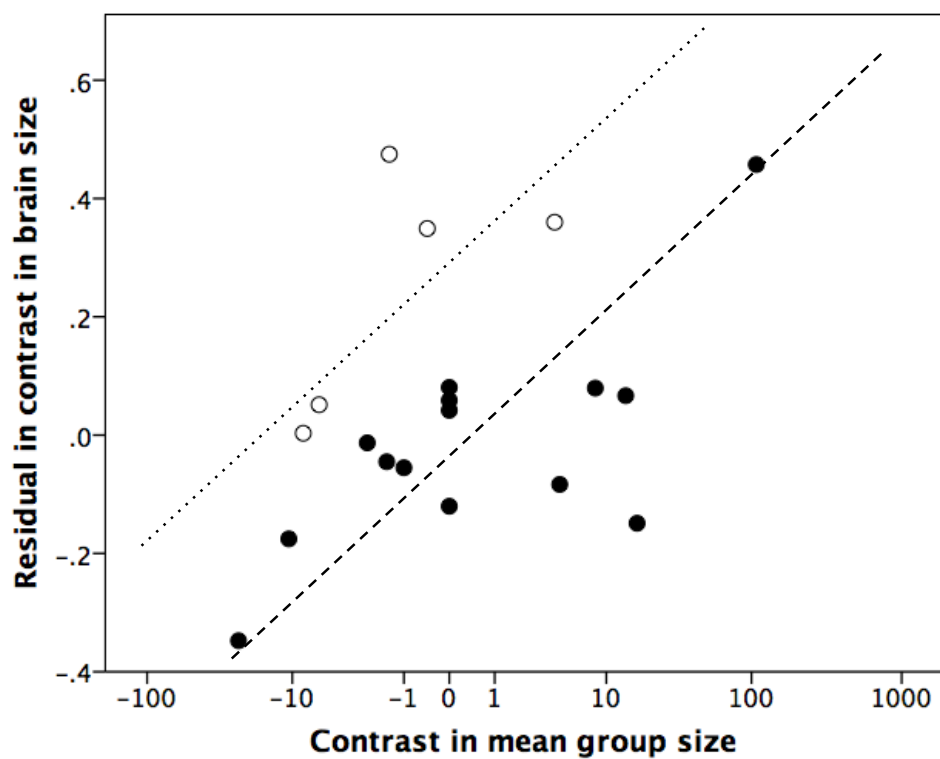

389  
390

391  
392  
393

394  
395

396

397

398

**Figure 4**

399

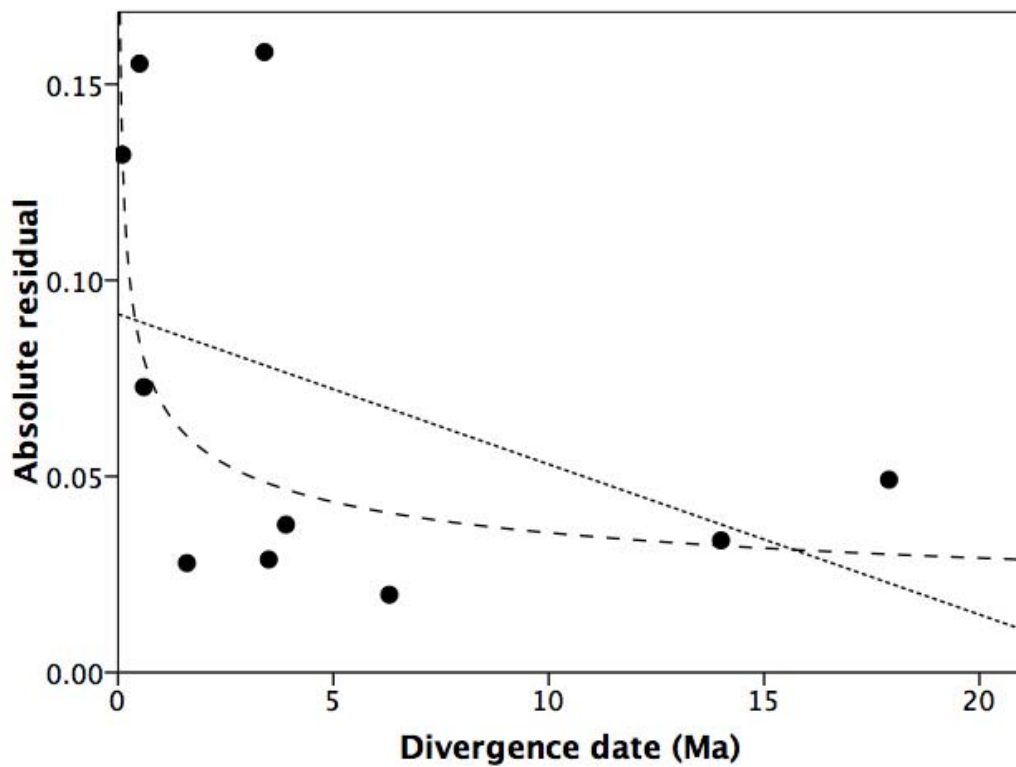

400  
401  
402  
403

404

### Figure 5

405

406

407

408

409

410

411

412

413

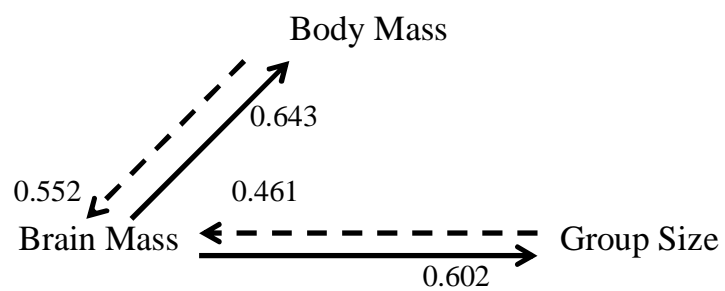

Source: https://www.biorxiv.org/content/10.1101/355453v1.full.pdf
